# Supplementary material
Source: ML conference proceedings conference paper supplement (https://openaccess.thecvf.com/content/CVPR2026/html/Wang_Goal-Driven_Reward_by_CVPR_2026_paper.html)
Supplement: Supplementary file 1 [file Wang_Goal-Driven_Reward_by_CVPR_2026_supplemental.pdf]

# Goal-Driven Reward by Video Diffusion Models for Reinforcement Learning

## Supplementary Material

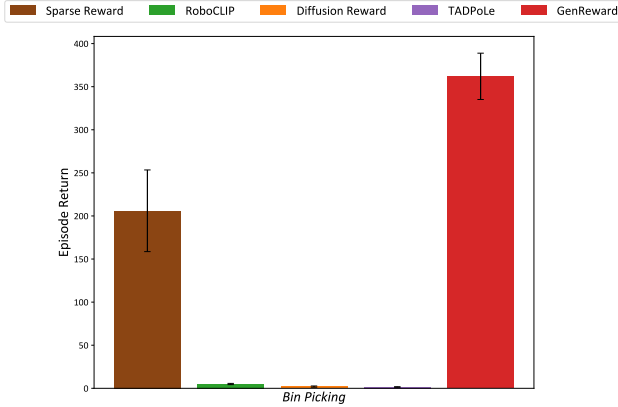

Figure A. Performance on Meta-World *Bin Picking* under sparse reward setting.

Table A. Performance comparison across various environments.

| Model               | Raw Reward | RoboCLIP | Diffusion Reward | GenReward        |
|---------------------|------------|----------|------------------|------------------|
| <i>Walker Walk</i>  | 640 ± 74   | 695 ± 94 | 28 ± 2           | <b>782 ± 110</b> |
| <i>Hopper Stand</i> | 646 ± 161  | 589 ± 44 | 776 ± 58         | <b>821 ± 96</b>  |
| <i>Adroit Door</i>  | 60 ± 20    | 70 ± 20  | 0 ± 0            | <b>90 ± 10</b>   |
| <i>MW Reach</i>     | 25 ± 5     | 45 ± 5   | 60 ± 10          | <b>85 ± 5</b>    |

## A. Additional Results

### A.1. Results with Sparse Rewards

Different from dense reward settings, we consider a setup with a sparse reward function for the Meta-World tasks. Under this setting, the agent receives a reward every 64 steps, with the reward set to 0 before that. We present quantitative results of sparse rewards in Figure A. It can be observed that GenReward still achieves consistent improvements compared to other baselines even with sparse rewards, demonstrating its effectiveness.

### A.2. Evaluation on Challenging Benchmark

We reimplement GenReward with the model-free *DrQ-v2* [37] backbone on DCS and Adroit [20] (both dense reward), and on Meta-World (limited training steps with *0/1 sparse reward*), reporting *success rates* for Adroit and Meta-World. Notably, we use text-to-video generation *without finetuning* on DCS. As reported in the Table A, GenReward consistently outperforms baselines across all benchmarks and reward settings.

Table B. Performance with hallucination.

| Model             | Dense Reward | GenReward w/ hallucination | GenReward       |
|-------------------|--------------|----------------------------|-----------------|
| <i>Pick Place</i> | 454 ± 30     | 574 ± 98                   | <b>796 ± 73</b> |

Table C. Impact of individual components.

| Model              | GenReward w/o CLIP | GenReward w/SigLIP 2 | GenReward        |
|--------------------|--------------------|----------------------|------------------|
| <i>Walker Walk</i> | 663 ± 16           | 448 ± 122            | <b>782 ± 110</b> |

Table D. Performance of GenReward variants on DCS *Walker Walk*.

| Model              | GenReward w/o action | GenReward w/ real | GenReward |
|--------------------|----------------------|-------------------|-----------|
| <i>Walker Walk</i> | 435 ± 249            | <b>784 ± 67</b>   | 782 ± 110 |

## A.3. Results on Video Hallucinations

We do not address hallucinations. Instead, we train our method on generated videos exhibiting hallucinations (*i.e.*, object teleportation). Interestingly, as reported in Table B, the agent consistently benefits from the proposed reward mechanism.

## A.4. Component Sensitivity

The results of 1) replacing CLIP with random goal image selection, 2) replacing DINOv3 with SigLIP 2 are shown in Table C. Overall, the original design achieves the best performance among these variants

## A.5. Comparison of GenReward Variants

Table D shows that our method is competitive with the real-video variant. Moreover, when computing the FB reward, removing the action leads to decreased performance (see Table D).

## A.6. VDM Adaption Details.

Finetuning VDM takes 7 days using 16 A100 GPUs. We randomly select 400 samples from finetuning data. The FVD score is 21.6 indicates high fidelity of VDM.

## A.7. Computational Complexity

Table E shows that, when training for 1M steps, GenReward trains faster than all baselines, except raw dense reward.

## B. Forward-Backward Network Details

The forward-backward objective originates from approximating the successor measure  $M^{\pi_z}(s, a, s')$ , which de-

Table E. Training time comparison between baselines on Meta-World *Pick Place*.

| Model         | Dense Reward | RoboCLIP  | Diffusion Reward | GenReward |
|---------------|--------------|-----------|------------------|-----------|
| Training time | 102 hours    | 119 hours | 109 hours        | 106 hours |

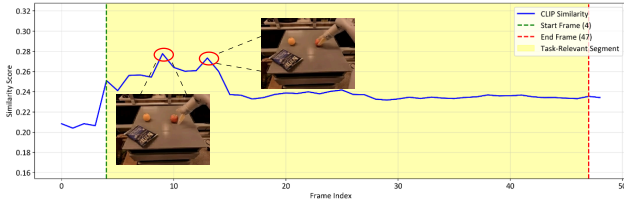

Figure B. Failure Case of CLIP-based frame selection in a generated RT-1 *Pick Apple* video. The most relevant frame does not fully grasp the apple, while the second-most relevant frame actually contains a successful grasp.

describes the discounted occupancy of future states  $s'$  reachable from  $(s, a)$  under the policy  $\pi_z$ . In the low-rank factorization (see Eq. (7)), the inner product  $F(s, a, z)^\top B(s')$  acts as a learned similarity measure: it is large if  $s'$  is likely to be visited from  $(s, a)$ . Minimizing the Bellman residual on this approximation, as detailed in Eq. (8), therefore encourages future states that are likely to be visited from  $(s, a)$  under  $\pi_z$  to receive high similarity scores in the latent space. Additionally, the orthonormalization loss  $\mathcal{L}_{\text{norm}}$  regularizes the backward representations to prevent degenerate collapse and ensure feature isotropy. Concretely,  $\mathcal{L}_{\text{norm}} = \left\| \mathbb{E}_\rho[B B^\top] - I_d \right\|_F^2$ . Here  $\|\cdot\|_F$  is Frobenius norm. Detailed derivation of FB loss (see Eq. (8)) can be found in [30].

### C. Effect of Frame-Level Goal Selection

As shown in Figure B, in some cases, CLIP may select a frame that is not the most relevant as the goal image. Interestingly, GenReward with RT-1 *Pick Apple* video still outperforms DreamerV3 with original reward (see Figure 9). Although not the most relevant, the frame-level goal selected by CLIP can still facilitate fine-grained goal achievement of the agent.

### D. Hyperparameters

The final hyperparameters of GenReward are listed in Table F.

Table F. Hyperparameters of GenReward.

| Name                            | Notation              | Value              |
|---------------------------------|-----------------------|--------------------|
| Video-Level Reward              |                       |                    |
| Reward weight                   | $\alpha$              | $1 \times 10^{-2}$ |
| Forward-Backward Reward         |                       |                    |
| Reward weight                   | $\beta$               | $1 \times 10^{-5}$ |
| Train steps                     | —                     | $1 \times 10^5$    |
| Observation dimension           | —                     | 384                |
| Feature dim                     | $d$                   | 512                |
| Hidden dim                      | —                     | 512                |
| Learning rate                   | —                     | $1 \times 10^{-4}$ |
| Target network soft-update rate | —                     | 0.01               |
| General                         |                       |                    |
| Replay capacity                 | —                     | $1 \times 10^6$    |
| Batch size                      | $B$                   | 16                 |
| Batch length                    | $T$                   | 64                 |
| Train ratio                     | —                     | 512                |
| Intrinsic reward interval       | —                     | 128                |
| World Model                     |                       |                    |
| Deterministic latent dimensions | —                     | 512                |
| Stochastic latent dimensions    | —                     | 32                 |
| Discrete latent classes         | —                     | 32                 |
| RSSM number of units            | —                     | 512                |
| World model learning rate       | —                     | $1 \times 10^{-4}$ |
| Reconstruction loss scale       | $\beta_{\text{pred}}$ | 1                  |
| Dynamics loss scale             | $\beta_{\text{dyn}}$  | 0.5                |
| Representation loss scale       | $\beta_{\text{rep}}$  | 0.1                |
| Behavior Learning               |                       |                    |
| Imagination horizon             | $H$                   | 15                 |
| Discount                        | $\gamma$              | 0.997              |
| $\lambda$ -target               | $\lambda$             | 0.95               |
| Actor learning rate             | —                     | $3 \times 10^{-5}$ |
| Critic learning rate            | —                     | $3 \times 10^{-5}$ |
